# Supplementary material
Source: PubMed Central journal article supplement (PMC4266993)
Supplement: NIHMS634063-supplement-01.pdf [file NIHMS634063-supplement-01.pdf]

## Supplementary appendix

This appendix formed part of the original submission and has been peer reviewed. We post it as supplied by the authors.

Supplement to: Kyle RA, Larson DR, Therneau TM, et al. Clinical course of light-chain smouldering multiple myeloma (idiopathic Bence Jones proteinuria): a retrospective cohort study. *Lancet Haematol* 2014; published online Sept 22. [http://dx.doi.org/10.1016/S2352-3026\(14\)70001-8](http://dx.doi.org/10.1016/S2352-3026(14)70001-8).

## Online Supplementary Material

**Online Figure 1. Association of level of Urinary Monoclonal Protein level on the Risk of Progression to Myeloma or light chain (AL) amyloidosis in patients with Idiopathic Bence Jones Proteinuria.** The relative risk of progression was estimated using a Cox proportional hazards regression model in which the covariate is modeled as a smoothed version of the size of the urine M-spike using a smoothing spline. Error bars represent 95% confidence intervals as follows: (0.56, 1.12%), (0.81, 2.8%), (1.04, 7.37%).

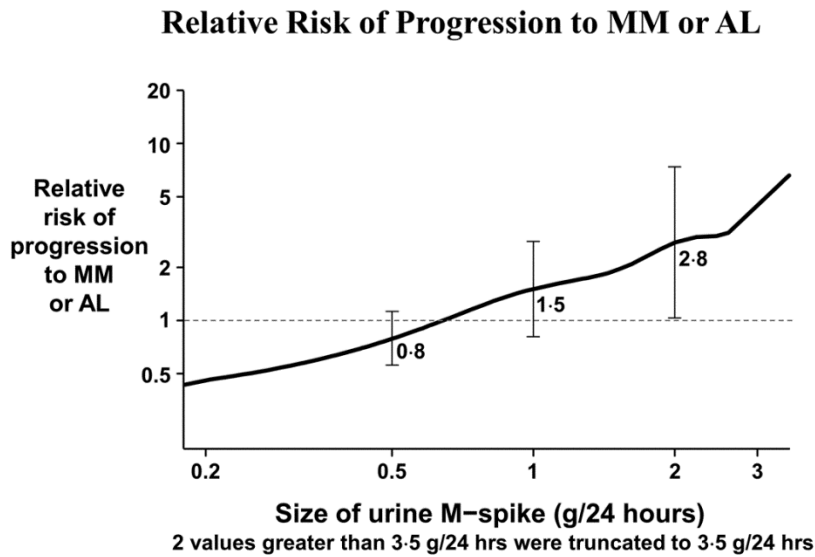

**Online Table 1. Univariate Analysis of Other Baseline Parameters on the Risk of Progression to Myeloma or light chain (AL) amyloidosis in patients with Idiopathic Bence Jones Proteinuria**

| <b>Risk Factor</b>          | <b>No. of Patients<br/>(Total)</b> | <b>No. of Events<br/>(progression)</b> | <b>Hazard<br/>Ratio</b> | <b>95% CI</b> | <b>p-value</b> |
|-----------------------------|------------------------------------|----------------------------------------|-------------------------|---------------|----------------|
| Age at diagnosis            | 101                                | 34                                     | 0.983                   | (0.96, 1.01)  | 0.1849         |
| Gender (male versus female) | 101                                | 34                                     | 0.944                   | (0.44, 2.04)  | 0.8835         |
| Hemoglobin                  | 100                                | 33                                     | 0.919                   | (0.79, 1.07)  | 0.2831         |
| Serum Calcium               | 96                                 | 33                                     | 1.36                    | (0.76, 2.45)  | 0.3053         |
| Serum Albumin               | 85                                 | 31                                     | 1.96                    | (0.88, 4.34)  | 0.0959         |
